# Supplementary material for: Extensive loss of Wnt genes in Tardigrada
Source: Springer Nature journal article supplement (doi:10.1186/s12862-021-01954-y), 2021-12-01

# Extensive loss of Wnt genes may be related to miniaturization in Tardigrada

Authors:

Raul A. Chavarria; Mandy Game; Briana Arbelaez; Chloe Ramnarine; Zachary K. Snow; Frank W. Smith\*

Additional file 1\_Fig\_S1

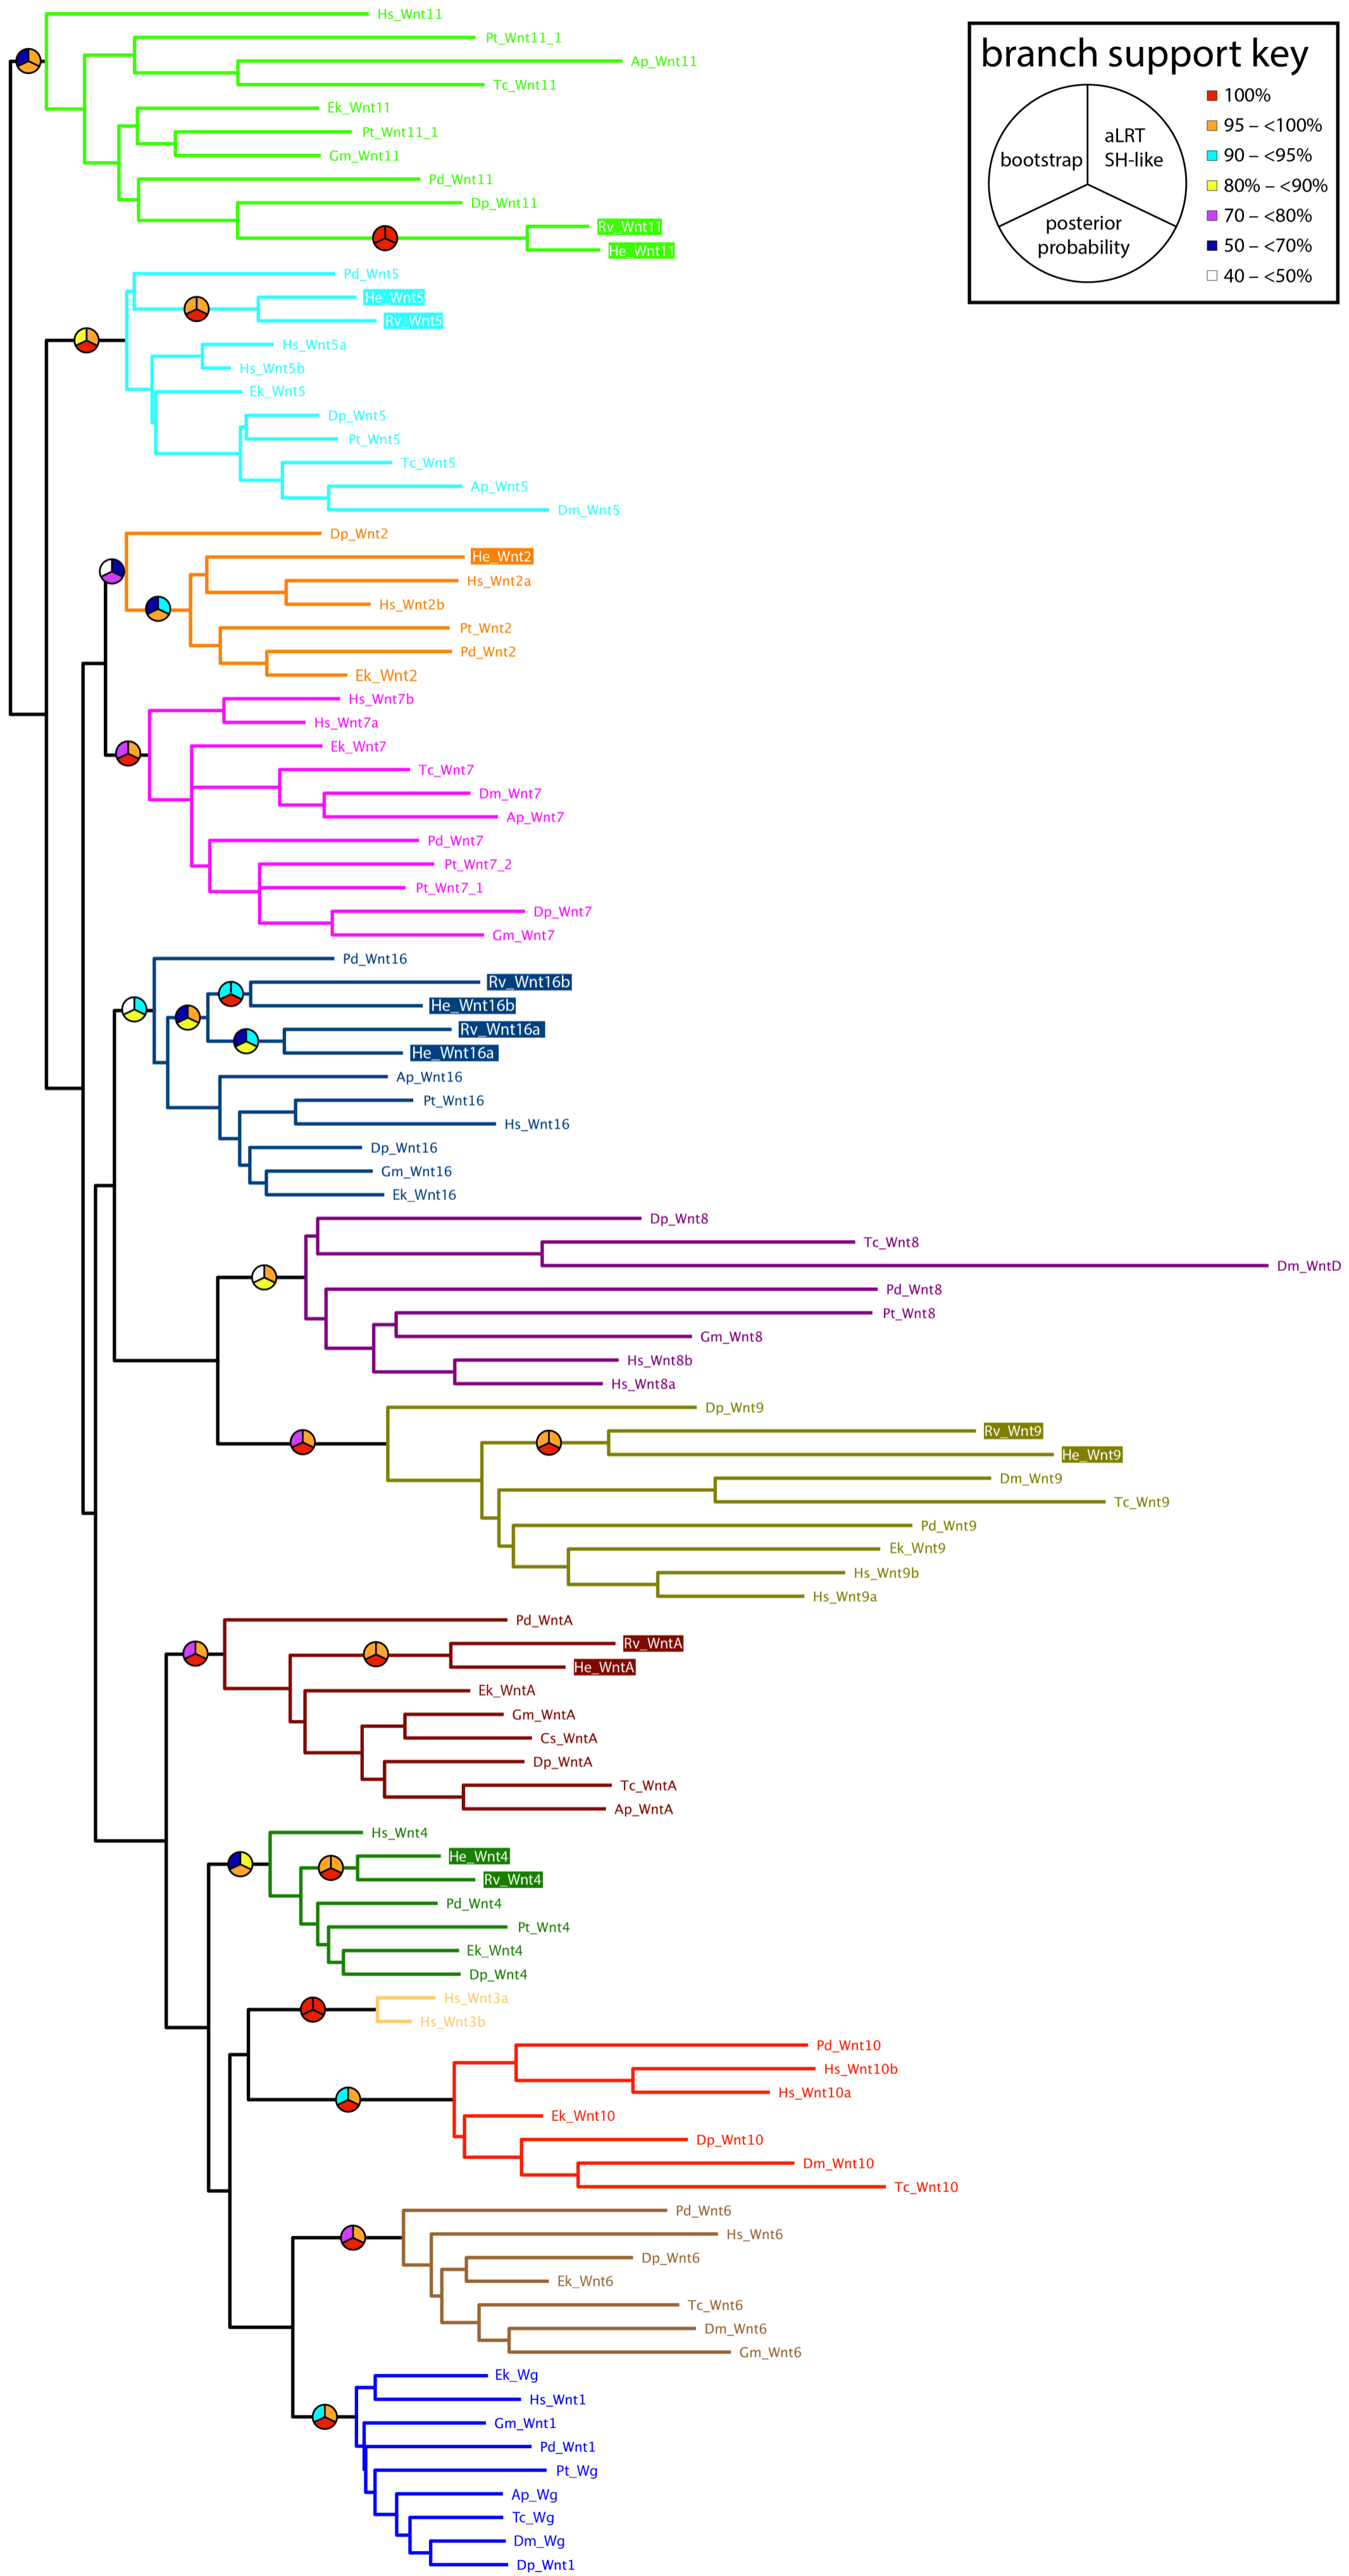

Supplement: 12862_2021_1954_MOESM1_ESM.pdf [file 12862_2021_1954_MOESM1_ESM.pdf]
